# Supplementary material for: Barley plants over-expressing the NAC transcription factor gene HvNAC005 show stunting and delay in development combined with early senescence
Source: PubMed Central journal article supplement (PMC5014165; doi:10.1093/jxb/erw286), 2016-07-19
Supplement: supp_erw286_supplementary_tables_S1_S5_figures_S1_S4.pdf [file supp_erw286_supplementary_tables_S1_S5_figures_S1_S4.pdf]

**Barley plants overexpressing the NAC transcription factor gene *HvNAC005* show stunting and delay in development combined with early senescence.**

MW Christiansen, C Matthewman, D Podzimska-Sroka, C O'Shea, S Lindemose, NE Møllegaard, IB Holme, K Hebelstrup, K Skriver, PL Gregersen

**Table S1.** Sequences of specific primers used for cloning, for check of transgenic barley plants, and generation of different constructs.

| <b>HvNAC005 cds PCR amplification – USER cloning</b>    |                                           |
|---------------------------------------------------------|-------------------------------------------|
| HvNAC005-Fw                                             | 5'-ATGATCATGTCCGACCCGG-3'                 |
| HvNAC005-Rev                                            | 5'-GATCGGTACCTTTAGAAATGGAGCAGCGGCT-3'     |
| <b>Check of transgenic barley lines with qRT-PCR</b>    |                                           |
| NAC5-prom_junc_Fw                                       | 5'-ACAACCAGATCTCCCCAAA-3'                 |
| NAC5-prom_junc_Rev                                      | 5'-TTGCGGAGGTAGTGCAGGAT-3'                |
| NAC5-term_junc_Fw                                       | 5'-CCAAGTCGGCAACAACACCTTG-3'              |
| NAC5-term_junc_Rev                                      | 5'-ATCATCGCAAGACCGGCAACAG-3'              |
| <b>Genome walking for promoter cloning</b>              |                                           |
| Race-AP1:                                               | 5'-GTAATACGACTCACTATAGGGCACGCGTGG-3'      |
| AP2:                                                    | 5'-GGCACGCGTGGTCGACGGC-3'                 |
| HvNAC005-O:                                             | 5'-AACGCTCGAGGACGAAAACCCTAGCTG-3'         |
| HvNAC005-I:                                             | 5'-AGCTGGCTAGCTAGAGCTTGGAGTGCT-3'         |
| <b>Constructs for transactivation analysis in yeast</b> |                                           |
| HvNAC005-FL-Fw                                          | 5'-ATATATCATATGATCATGTCCGACCCG-3'         |
| HvNAC005-C-term-Fw                                      | 5'-GGAATTCCATATGAGCCAAGTGTCCCCGATGGCG-3'  |
| HvNAC005-355-Rev                                        | 5'-CCGGAATTCCTTACACCGCGGCCTGCAGTGT-3'     |
| HvNAC005-319-Rev                                        | 5'-CCGGAATTCCTTAGAGCGCGTGTCCGCTGTC-3'     |
| HvNAC005-250-Rev                                        | 5'-CCGGAATTCCTTACGCTGGCTGGCTCGTCGA-3'     |
| HvNAC005-218-Rev                                        | 5'-CCGGAATTCCTTAGAAATGGAGCAGCGGCTG-3'     |
| <b>Promoter cloning for EMSA analysis</b>               |                                           |
| MLOC_61774 Fw                                           | 5'-GCTACGGGATCCCAACACCTCTCTTCCAATTTGA-3'  |
| MLOC_61774 Rev                                          | 5'-CGTAGCTCTAGAGAAGCCGGTTGATGGCTTTGCT-3'  |
| MLOC_61801 Fw                                           | 5'-GCTACGGGATCCACTCCAATAAAACAAATCTCACA-3' |
| MLOC_61801 Rev                                          | 5'-CGTAGCTCTAGAGGCAAGCATAGTGAGTGAACCT-3'  |

**Table S2.** Accession numbers of HvNAC005 related proteins/genes used for the phylogenetic tree in Fig. 2.

| Name          | Protein/gene acc. # | Database       |
|---------------|---------------------|----------------|
| ANAC018       | AT1G52880.1         | TAIR           |
| ANAC025       | AT1G61110.1         | TAIR           |
| ANAC047       | AT3G04070.1         | TAIR           |
| ANAC056       | AT3G15510.1         | TAIR           |
| ANAC060       | AT3G44290.1         | TAIR           |
| AtNAP         | AT1G69490.1         | TAIR           |
| BdNAC005      | XP_003559782.1      | GenBank        |
| BdNAC006      | XP_003562891.1      | GenBank        |
| BdNAC023      | XP_003557998.1      | GenBank        |
| BdNAC090      | XP_003577115.1      | GenBank        |
| BeNAC1        | HM626401.1          | GenBank        |
| BnNAC2        | AFI56994.1          | GenBank        |
| GmNAC26       | NP_001238204.1      | GenBank        |
| HvNAC005      | AK251058.1          | GenBank        |
| HvNAC023      | CBZ41159.1          | GenBank        |
| HvNAC027      | BAJ99416.1          | GenBank        |
| HvNAC030      | ABI94358.1          | GenBank        |
| ONAC010       | LOC_Os07g37920.1    | MSU/RAP-DB     |
| ONAC016       | LOC_Os01g01430.1    | MSU/RAP-DB     |
| ONAC058       | LOC_Os03g21060.1    | MSU/RAP-DB     |
| ONAC103       | LOC_Os07g48450.1    | MSU/RAP-DB     |
| ONAC122       | LOC_Os11g03300.1    | MSU/RAP-DB     |
| ONAC131       | LOC_Os12g03040.1    | MSU/RAP-DB     |
| StNAC2        | NP_001275015.1      | GenBank        |
| TaNAC005-like | W5EN00_WHEAT        | uniprot_trembl |
| TaNAC25       | ADG85701.1          | GenBank        |
| TaNAC69       | AAU08785.1          | GenBank        |
| TtNAM-A1      | A0SPJ3.1            | GenBank        |
| TtNAM-B1      | A0SPJ4.1            | GenBank        |
| TtNAM-B2      | A0SPJ6.1            | GenBank        |
| ZmNAC118      | GRMZM2G109627_T01   | MaizeGDB       |
| ZmNAC122      | GRMZM2G430849_T01   | MaizeGDB       |
| ZmNAC25       | GRMZM2G127379_T01   | MaizeGDB       |
| ZmNAC44       | GRMZM2G011598_T01   | MaizeGDB       |
| ZmNAC81       | GRMZM2G042494       | MaizeGDB       |

**Table S3:** Genes, accession numbers (GenBank), and primer sequences for qRT-PCR gene expression experiments performed in this work.

| <b>Gene</b>                                                     | <b>Accession</b> | <b>Fw-primer</b>         | <b>Rv-primer</b>         |
|-----------------------------------------------------------------|------------------|--------------------------|--------------------------|
| <i>18S ribosomal RNA</i>                                        | AY552749.1       | ACGGCTACCACATCCAAGGA     | CAGGATTGGGTAATTTGCGC     |
| <i>9-cis-epoxycarotenoid dioxygenase (NCED1)</i>                | AK365103.1       | CGCCCTCCATCCCTCCCATCTTCT | CCGCCGCTAACTGTTTCTCTTCC  |
| <i>Amino acid permease</i>                                      | AK361903.1       | ACTTCGGCCCAGAAGATATGGC   | AGTAGGCGAATGCGATGTTCCC   |
| <i>APETALA2 and ethylene responsive element binding protein</i> | AK374826.1       | TGATGGACGACGGCAACTTCTG   | ATGTTGTGATGGGCGGTGATCC   |
| <i>CYSPEP</i>                                                   | AM941122.1       | AAAGGTGGCAAGGATTATTGG    | TGCCACAGATACCTGACGAT     |
| <i>HvNAC005</i>                                                 | AK251058.1       | CCATGTGAACAGCAGCGGCAAC   | CCGACGTTGAGGCTGGTGAATC   |
| <i>HvNAC013</i>                                                 | AK376297.1       | ATGCCGCCGCACATGATGTAC    | ACAGGTCGCCGGAATTAGCG     |
| <i>HvNAC027</i>                                                 | FR819765.1       | ACGGCTACGTGAACCACGACAC   | CAAGCTGCCGCTGGATCTCTTC   |
| <i>Jasmonate ZIM domain-containing protein</i>                  | AK358513.1       | CAGCAGAGCAACAAGCTCAACG   | TGGGCTGGTGAGTAAGTATCTGC  |
| <i>Nuclease I</i>                                               | AB028448.1       | ACTATTACTTCCGGGCGTTGCC   | TCTGCAGCCTGCTATTCTTCCC   |
| <i>Oxoglutarate/iron dependent dioxygenase</i>                  | AK355337.1       | CAGCAGAGCAACAAGCTCAACG   | TGGGCTGGTGAGTAAGTATCTGC  |
| <i>Pheophorbide a oxygenase (PaO)</i>                           | AK358479.1       | AGGCATCGAGAACTGGCAGAAG   | ACCAGTTCCTGAATGCGACGAC   |
| <i>Protein phosphatase 2C</i>                                   | BM816007         | TCGCAATGTCACGGTCAATCGG   | ACGCTGACTTCAGGCTTTGGAATC |
| <i>Protein phosphatase 2C</i>                                   | AK367469.1       | TGCTCACCAAGATGGCTCTCAC   | GAGATCGACGACGACAACAGAG   |
| <i>Protein phosphatase 2C</i>                                   | AK374059.1       | TCTTCCTTCCGTTCCCTCGTTC   | CAACAGCTGAGCTTCTCCGTTTC  |
| <i>RUBISCO small subunit</i>                                    | AB020943.1       | TCTTCCGTGAGCACAACAGC     | TCCAGTATCGGCCGTCGTAG     |
| <i>Saccharopine dehydrogenase</i>                               | AJ508229.2       | GTTTCAGAGGAAAGGCGTGATCC  | ACTCTCTCGATCAGCTGAATGCC  |
| <i>Stay green protein (SGR)</i>                                 | AY850135.1       | CGTGGTTGTTGTACGGGCAAAG   | CAGTGGGATCTTGTTCAGCATCG  |
| <i>Splicing factor 2 (SP2)</i>                                  | AK249101.1       | GAAGGATGAGTAGGCGCTGG     | CTGGGAGGTTCCCAACGTAA     |
| <i>Zeatin O-glucosyl-transferase (ZOG)</i>                      | AK364192.1       | AGAAGAAGGCACACGAGTGGAG   | TCGTCSAAGTTGCGGTGAGATG   |

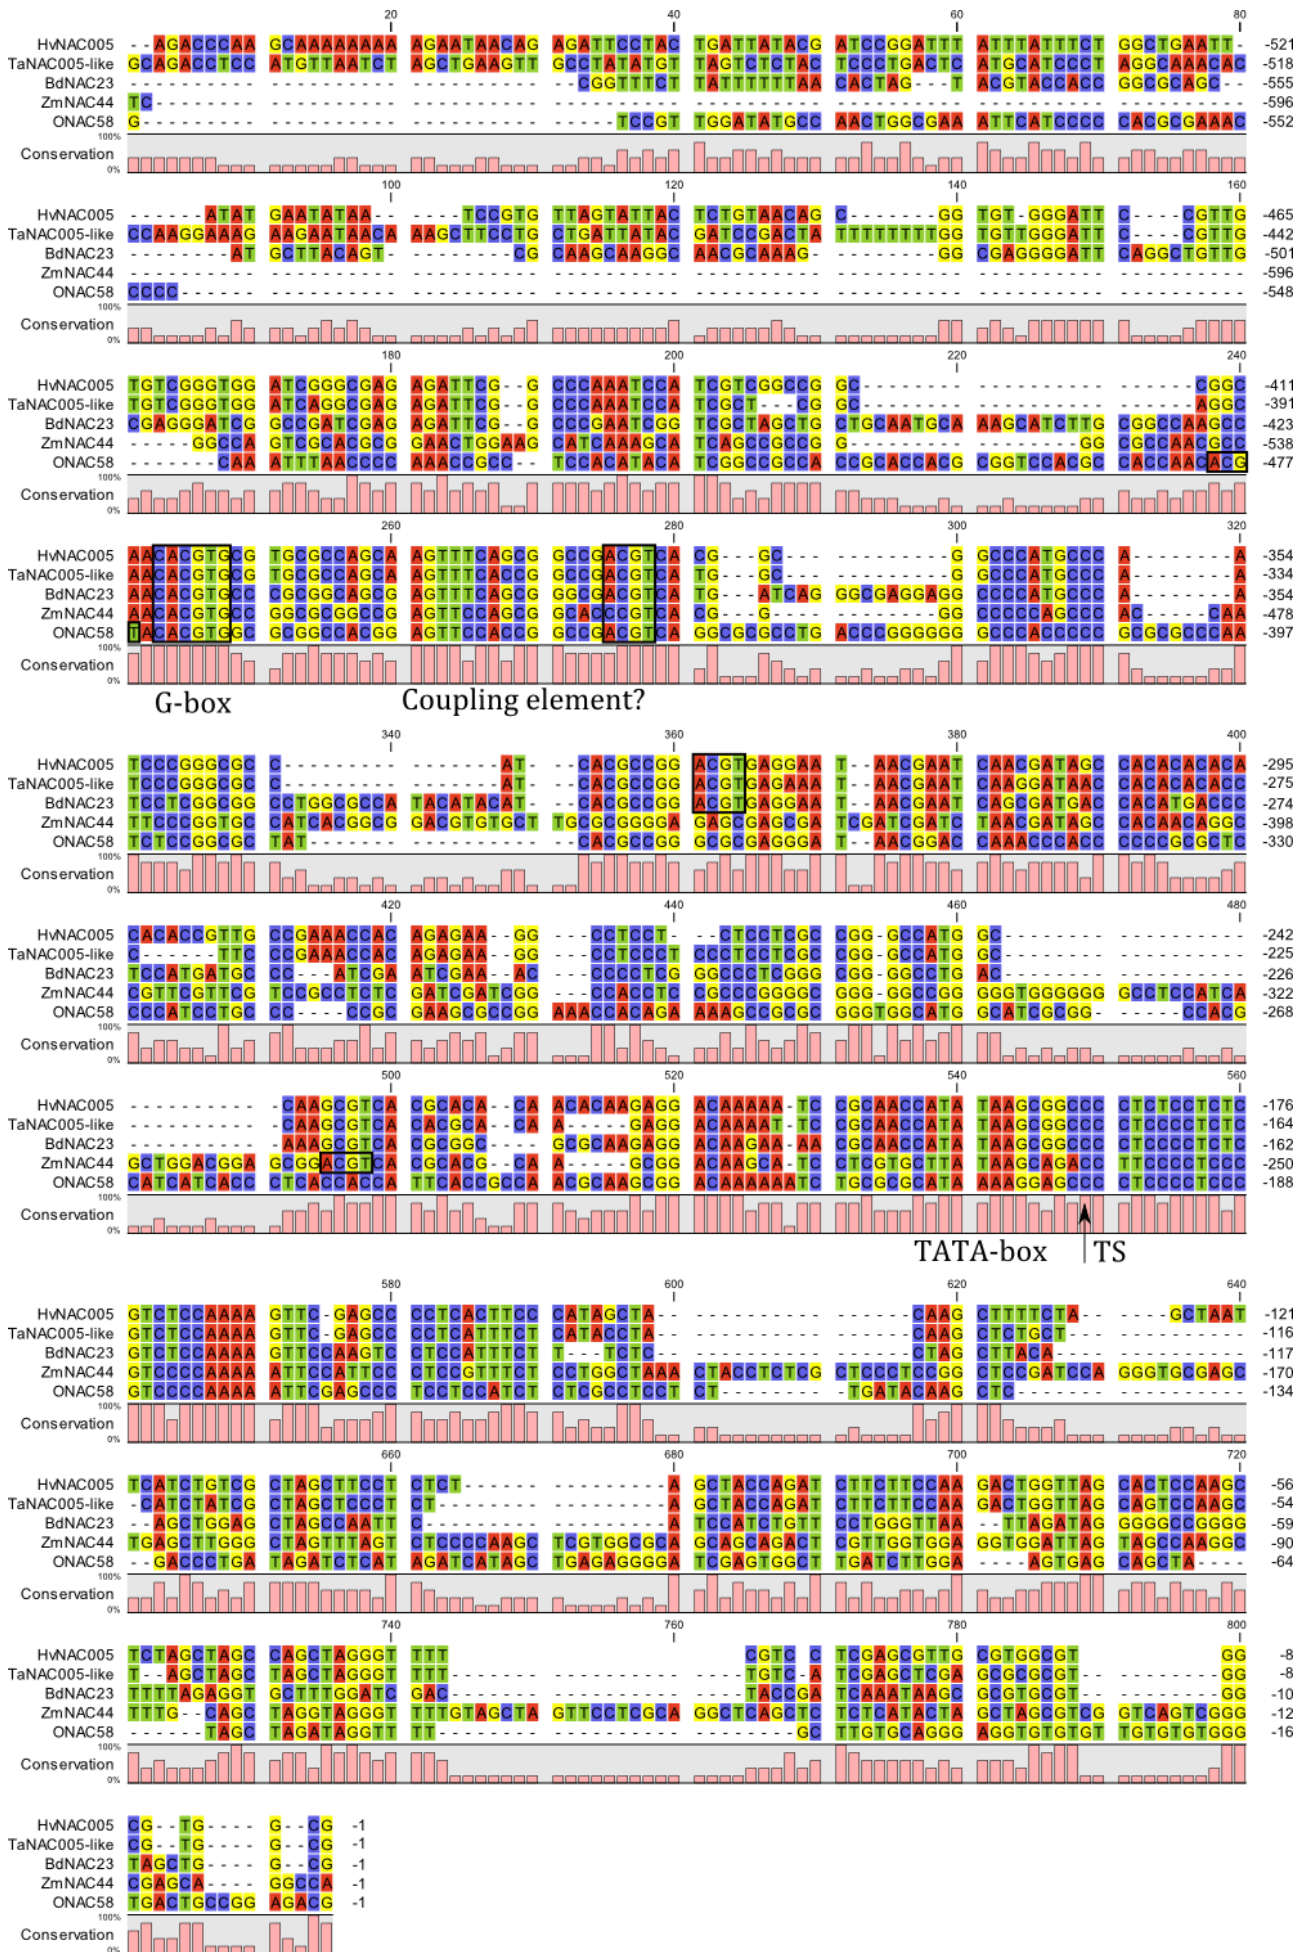

**Fig S1.** Alignment of the promoter (600 bp upstream of ATG) of HvNAC005 and the four most closely related genes from wheat, Brachypodium, maize and rice (see Fig. 2). G-box: an ABRE-like CACGTG motif. TS: transcription start. A potential ABRE coupling element is indicated, as well as the putative TATA box. ACGT containing motifs are delineated by black rectangles.

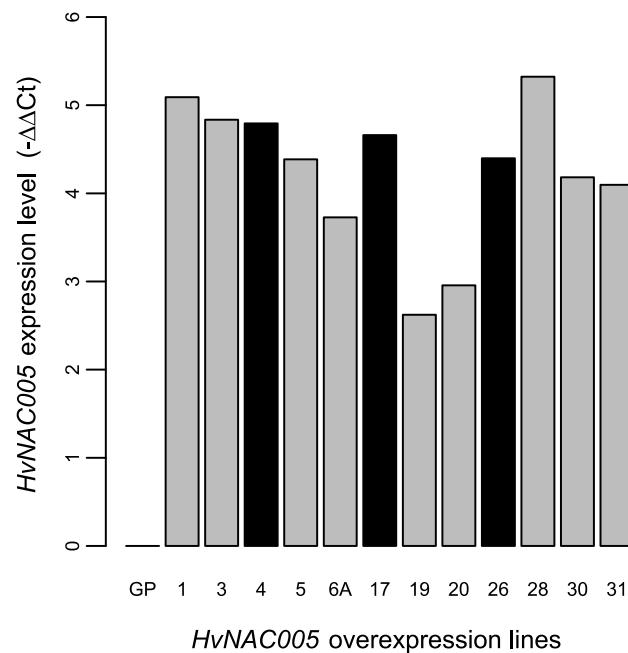

**Fig. S2.** *HvNAC005* expression level, as determined by qRT-PCR, for 12 *HvNAC005* overexpression T<sub>0</sub> lines. Gene expression levels (-ΔΔCt, i.e. log<sub>2</sub> scale) were normalized to the expression level of *18S rRNA* and with barley ‘Golden Promise’ (GP) control line as the calibrator sample. Since only one plant per line was available, the determinations are based on only one biological replicate with three technical replicates, except for GP and line 26 (T<sub>1</sub> plants), which are based on 4 biological replicates. Black bars: the three lines that were used for further characterization of *HvNAC005* overexpressing plants. Gray bars: lines that were not used for further characterization, due to bad seed setting or low expression of *HvNAC005*.

**Table S4.** Mean number of days after sowing when half of the final number of spikes with visible awns had appeared. Numbers of awns were recorded twice a week, when SPAD measurements were taken, placing the number of days into slots with 3-5 days intervals. A t-test was used to estimate statistical delays in this number in HvNAC005 over-expression lines.

| Line                    | Number of plants | Days after sowing +/- SE | P-value, t-test     |
|-------------------------|------------------|--------------------------|---------------------|
| HvNAC005-OE-4           | 4                | 97.0 +/- 1.1             | 0.028*              |
| HvNAC005-OE-4-null      | 6                | 93.0 +/- 1.0             |                     |
| HvNAC005-OE-17          | 3                | 100.7 +/- 2.3            | 0.191 <sup>NS</sup> |
| HvNAC005-OE-17-null     | 3                | 96.3 +/- 0.75            |                     |
| HvNAC005-OE-26          | 4                | 98.2 +/- 0.75            | 0.004**             |
| HvNAC005-OE-26-null     | 5                | 94.0 +/- 0.0             |                     |
| Golden Promise          | 4                | 95.5 +/- 0.87            |                     |
| null vs. Golden Promise |                  | 94.4 vs. 95.5            | 0.335 <sup>NS</sup> |
| OE vs. Golden Promise   |                  | 98.2 vs. 95.5            | 0.045*              |

**Table S5.** Mean number of tillers in plants of transgenic and control lines when the experiment was terminated 116 days after sowing. A t-test was used to estimate statistical differences among the lines.

| Line                 | Number of plants | Final number of tillers +/- SE | P-value, t-test    |
|----------------------|------------------|--------------------------------|--------------------|
| HvNAC005-OE-4        | 5                | 96 +/- 13                      | 0.19 <sup>NS</sup> |
| HvNAC005-OE-4- null  | 4                | 79 +/- 8                       |                    |
| HvNAC005-OE-17       | 3                | 130 +/- 27                     | 0.57 <sup>NS</sup> |
| HvNAC005-OE-17- null | 3                | 111 +/- 10                     |                    |
| HvNAC005-OE-26       | 3                | 100 +/- 3                      | 0.049*             |
| HvNAC005-OE-26- null | 4                | 119 +/- 7                      |                    |
| Golden Promise       | 4                | 92 +/- 11                      |                    |

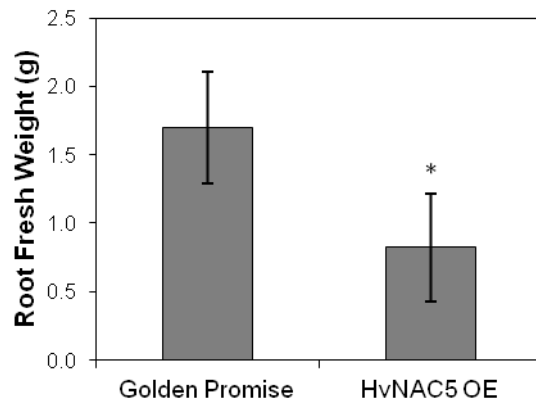

**Fig. S3.** Characterization of T<sub>1</sub> plants from *HvNAC005* overexpression line HvNAC005-OE-26. Fresh weight of roots from four week old seedlings. Error bars: standard deviation. Asterisk indicate reduced root mass in the HvNAC005-OE line,  $p < 0.05$  (t-test).

A) MLOC\_61774|MLOC\_61774.1

CAACACCTCTCTTCCAATTTGAGCTTCAAGTACAACCACAAATGGAGTGGCATCTTCAA  
CCGAGCACCATTCCCTTCACCTCTTAGCCTACACACTTCATCTCACTTATCTCCAATCAC  
ATCAGTCAAAAACCTTCGGCAATGGATCATCATGCCATTCAATAAATCCACAACCACCATG  
TTGTTCAATTTTAGTAATAGAAATCAATCAGTGGGGAGGAGAACAATGAAGAGAAACAA  
ACAGAAATCCAACCTCACCATGGCATCGATGCATGCGTAGTACCTTCTGCCTGGATTATGA  
ATGCTCGAGGAGATCCATCTTGACCTTCCGACAGGATTGCACCAGCAAAGCTTCTGC  
GGCTCGAACCCATCGGGCTCTCCCTATAAAGCACCGATGACCTCGACTCCCCCTCTCC  
TTCCTGCGGCTCAACGAAAGCCAGGAGCAGCAGAATGACCCGATGACCACGACATCCAT  
TGGACAGATCCGCCGCCGCCCTCTCCCTAGTTCTCCCACTCGAAAATCCCCAATTA  
ATTTGATGTTCCCTCATCTCTCCCCGCAACGCGTTATAATGCAACCTGGCCCATTAGTC  
ATAAAGAATTCCGGTAGACTCTTGCCATGTCATCATGTTTAGCTCTAAATGACGTTAGGT  
TTTAATTTAGACCGGAATTTATAAATTTAGAGCATAAACAATAAGGATTTTAACTTCAGA  
GTTCCGGTTCGCTCAAGGACTAGAGTTCAATGTTTAAATGGACCTTTTCGTTTGTGAGCT  
CTGTGTCTGCCGCCGAGTTAACAACCTGAACTGCGGCACGAGCGGAGTGCAGCCACCAC  
GTGCGAAAATGTCTTGCTGTCCAGTAATCATTGTATAATCTCGTTCGACCAGCACGTGTT  
CTTCGTCGAGAGACCTCCAGGAAGAAACACCCACATTAGACAGCAACAGCCCACAGGAC  
ACGCTTCGATTCCTATAAAGCAAAGCCATCAACCGCTTC

B) MLOC\_61801|MLOC\_61801.1

ACTCCAATAAAACAAATCTCACATTCACCTAGCTCCACCTGTGCGCATACGTTGACAC  
CCCTTTGCTAGAATCCTCATCCTCATCGCCGGCATCCTTAATGTCATCCACACTAGGGAG  
AACATGAAGGCAACCAAGAAGACACACATGGAGGGAACCTGAGACAGGTGTCGCAACTAGG  
AGTCCAAGCAAACATTTCAATACAATAGCCAAAGGAAATGGCCTTGAGAATAGCAGCTTG  
TTTGCTGGCACGTTAGTGGTAGCAAACAAAACGTGATGATATTCTCAAGGTTGTTGTC  
CTTGAAGACTACAACGCTTTCTTTCTTTGCACCAGTACGACACTTGTACAGGTCCAAT  
CCTTGTGCTTCTTCTTGGTCGAGCATGGCCACATAAATTTGGATATTTATCATTGTC  
GGCGCTCAAACCTCCGGATGACCATTCAACTCTTCTTGCATGTGGCGATGCAGATCTCCC  
AATCTACGATAATGCTGTGTCTAGTTTGATCTTGATGATTAATTTGTGCTAACATAA  
TTTTTCATGTTCTTTTTTTGGATTAATCTAATTTGAAAATTAATATTTTTATTTAACACA  
GTGTGATTTGGACAGGACAAGGAGCATCGGATGATGGTTCCAGTACGGACTTAGGAGAG  
AAAACCTACGACCGCCATTTTGGGGAAGACTCGAGCAAGGCTGCCATGTAAAACCTTCTA  
TTCCTTCTGTATCTAAATAATTATATTTGAAAAAACTAAAGTAAAAGAGATTATATTTA  
GAAACGGAACAAGTAGCAATTGAAGCGAGTAATAGATCCACCCGACATGTCCATGTGGAG  
CTTAATTCCTGAAAGTTTTATCCTCGATCCAAGTTAATTATATGAACTACAATAAA  
GAACCAATACCTCCCAATCGGTCGACCTAAATCACCTTTCGTTACCTCCATCATAACCAGACA  
CTATTTGAGAGACGTCTTAGGTTCACTCACTATGCTTGCC

**Fig. S4.** Promoter sequences of two genes selected among the upregulated genes in the gene expression microarray for *HvNAC005* overexpressing plants. CGT/ACG (yellow/green) motifs potentially contained in NACBSs are highlighted. A) Gene encoding a ZIM domain protein (EnsemblPlants: MLOC\_61774.1; GenBank: AK358513.1). B) Gene encoding a putative zeatin glucosyltransferase (ZOG) (EnsemblPlants: MLOC\_61801.1; GenBank: AK364192.1).
